# Supplementary material for: Efficacy of three feeding regimens for home-based management of children with uncomplicated severe acute malnutrition: a randomised trial in India
Source: PubMed Central journal article supplement — BMJ Glob Health. 2016 Dec 30;1(4):e000144. doi: 10.1136/bmjgh-2016-000144 (PMC5321385; doi:10.1136/bmjgh-2016-000144), 2016-12-30
Supplement: bmjgh-2016-000144supp.pdf [file bmjgh-2016-000144supp.pdf]

## RECIPES, INGREDIENTS AND ENERGY CONTENT FOR AUGMENTED HOME PREPARED FOODS

Action Research and Training for Health, Udaipur, Rajasthan

| Sr. No | Name of Recipe                      | Ingredients                 | Cooking Time | Quality of Cooked Food (g) | Nutritive Value per 100g |            |
|--------|-------------------------------------|-----------------------------|--------------|----------------------------|--------------------------|------------|
|        |                                     |                             |              |                            | Kcal                     | Protein(g) |
| 1      | DALIA PORRIDGE (SWEET DALIA/ LAPSI) | Dalia (broken wheat) 1 bowl | 50 min       | 650                        | Kcal                     | 208.15     |
|        |                                     | Oil- 1 ladle                |              |                            | Protein(g)               | 3.12       |
|        |                                     | Cow milk- 2 glasses         |              |                            | Fat(g)                   | 13.26      |
|        |                                     | Sugar- 1 bowl               |              |                            |                          |            |
|        |                                     | Water- 3 glasses            |              |                            |                          |            |
| 2      | DALIA KHICHERI                      | Dalia (broken wheat) 1 bowl | 1 hr         | 700                        | Kcal                     | 194.01     |
|        |                                     | Oil- 1 ladle                |              |                            | Protein(g)               | 5.33       |
|        |                                     | Cow milk- 2 glasses         |              |                            | Fat(g)                   | 12.43      |
|        |                                     | Moong Da- 1 Bowl            |              |                            |                          |            |
|        |                                     | Water- 6 glasses            |              |                            |                          |            |
|        |                                     | Salt as per taste           |              |                            |                          |            |
| 3      | MAKKI KA GHAAT (MAIZE KHICHERI)     | Broken Maize (dalia)        | 1 hr         | 700                        | Kcal                     | 194.11     |
|        |                                     | Oil- 1 ladle                |              |                            | Protein(g)               | 5.23       |
|        |                                     | Cow milk- 2 glasses         |              |                            | Fat(g)                   | 12.63      |
|        |                                     | Moong Da- 1 Bowl            |              |                            |                          |            |
|        |                                     | Water- 6 glasses            |              |                            |                          |            |
|        |                                     | Salt as per taste           |              |                            |                          |            |
| 4      | SUJI HALWA (SUJI PORRIDGE)          | Suji- 1 ½ bowl              | 20 min       | 700                        | Kcal                     | 285.2      |
|        |                                     | Oil- 1 ½ ladle              |              |                            | Protein(g)               | 4.03       |
|        |                                     | Cow milk- 2 ½ glasses       |              |                            | Fat(g)                   | 17.46      |
|        |                                     | Sugar- 1 ½ bowl             |              |                            |                          |            |
| 5      | SUJI UPMA                           | Suji- 1 ½ bowl              | 20 min       | 675                        | Kcal                     | 236.8      |
|        |                                     | Oil- 1 ½ ladle              |              |                            | Protein(g)               | 4.03       |
|        |                                     | Cow milk- 2 ½ glasses       |              |                            | Fat(g)                   | 18.1       |
|        |                                     | Salt as per taste           |              |                            |                          |            |

|   |                 |                     |      |     |            |        |
|---|-----------------|---------------------|------|-----|------------|--------|
| 6 | SALTED KHICHERI | Rice- 1 bowl        | 1 hr | 700 | Kcal       | 194.41 |
|   |                 | Oil- 1 Ladle        |      |     | Protein(g) | 4.8    |
|   |                 | Cow milk- 2 glasses |      |     | Fat(g)     | 12.31  |
|   |                 | Moong dal- 1 bowl   |      |     |            |        |
|   |                 | Water- 6 glasses    |      |     |            |        |
|   |                 | Salt as per taste   |      |     |            |        |

**Christian Medical College, Vellore, Tamil Nadu**

| S.No | Recipe Name                     | Raw Ingredients                                                                                                        | Cooked amount<br>(in gm and household measure)<br>1cup=200ml | Energy content | Energy per 100 g cooked amount |
|------|---------------------------------|------------------------------------------------------------------------------------------------------------------------|--------------------------------------------------------------|----------------|--------------------------------|
| 1    | <u>Rice- Pulse porridge</u>     | Rice flour 15gm<br>Roasted green gram flour/roasted Bengal gram flour- 10gm<br>Sugar -15gm<br>Milk- 200ml<br>Oil- 10gm | 200ml/ 1 cup                                                 | 370 cal/200ml  | 185cal/100ml                   |
| 2.   | <u>Ragi porridge</u>            | Ragi flour- 25 gm<br>Sugar- 15gm<br>Milk- 200 ml<br>Oil- 10gm                                                          | 200ml/ 1 cup                                                 | 365 cal/200ml  | 180cal/100ml                   |
| 3.   | <u>High Calorie Cereal Milk</u> | Rice flour- 15gm<br>Milk- 100ml<br>Sugar-10gm<br>Oil-5                                                                 | 125 ml                                                       | 230Cal/125 ml  | 187jcal/100ml                  |
| 4.   | <u>Pulse payasam</u>            | Roasted Bengal gram/ green gram- well cooked & mashed-15gm<br>Milk-100ml<br>Jaggery-20gm<br>Oil -5gm                   | 125ml                                                        | 240cal/125ml   | 190cal/100ml                   |
| 5.   | <u>Kichidi</u>                  | Rice- 15gm<br>Green gram dhal-10gm<br>Green leafy vegetable-10gm (optional)<br>Oil-5gm                                 | 100gm/ ½ cup                                                 | 130cal/100gm   | 130 cal/100gm                  |

|     |                         |                                                                                                                                                          |                   |              |              |
|-----|-------------------------|----------------------------------------------------------------------------------------------------------------------------------------------------------|-------------------|--------------|--------------|
| 6.  | <u>Ragi laddu</u>       | Roasted <i>ragi</i> flour- 25 gm<br>Roasted green gram dhal/roasted Bengal gram flour -10gm<br>Sugar/jaggery-25gm<br>Oil-5gm                             | 55gm/ 1 no.       | 257cal/55gm  | 465cal/100gm |
| 7.  | <u>Bengal gram vada</u> | Bengal gram soaked and coarsely ground- 25gm<br>Green leafy vegetables-10gm (optional)<br>Onions- 10gm (optional)<br>Oil-10gm (for frying)               | 50gm/ 1 no.       | 180cal/50gm  | 360cal/100gm |
| 9.  | <u>Sweet Rice Balls</u> | Roasted rice flour-25gm<br>Roasted green gram flour-15gm<br>Sugar- 15gm<br>Oil-10gm                                                                      | 85gm/2 balls      | 337cal/85gm  | 395cal/100gm |
| 10. | <u>Ragi Chapathi</u>    | Ragi flour-25gm<br>Roasted pulse flour (green gram/ Bengal gram) - 15gm<br>Green leafy vegetables – chopped 10gm (optional)<br>Oil- 5gm<br>Salt to taste | 60gm/ 2 small no. | 177/60gm     | 295cal/100gm |
| 11. | <u>Ragi burfee*</u>     | Roasted <i>ragi</i> flour-25gm<br>Roasted bengal gram flour-25gm<br>Oil-15gm<br>Sugar-50gm<br>Water-50gm                                                 | 150gm/ 3 pieces   | 435/100gm    | 435cal/100gm |
| 12. | <u>Ragi Halwa*</u>      | Roasted <i>ragi</i> flour-35gm<br>Jaggery-20gm<br>Deskins and roasted groundnuts-25gm<br>Water-50ml                                                      | 150ml/ 3 pieces   | 384cal/100gm | 384/100gm    |

Centre for Health Research and Development, Society for Applied Studies, New Delhi

| No | Recipe Name       | Raw Ingredients in gm/ ml (HH measures)                                                                                                       | Cooked amount (in gm and household measure) | Energy content | Energy per 100 g cooked amount |
|----|-------------------|-----------------------------------------------------------------------------------------------------------------------------------------------|---------------------------------------------|----------------|--------------------------------|
| 1. | <i>Khichri</i>    | <i>Moong dal</i> : 15gm (3 tsf), Rice: 15 gm (3 tsf), Water: 180 ml (1 glass), Oil: 15ml (3 tsf)                                              | 140gm (1 <i>katori</i> )                    | 239kcal        | 171kcal                        |
| 2. | Rice+ <i>Dal</i>  | <i>Moong dal</i> : 20 gm (4 tsf), Water: 180 ml (1 glass),<br>Rice: 15 gm (3 tsf), Water: 60 ml (1/3 <sup>rd</sup> glass), Oil: 10 ml (2 tsf) | 101gm (1 <i>katori</i> )                    | 211kcal        | 209kcal                        |
| 3. | Roti+ <i>Dal</i>  | <i>Moong dal</i> : 15 gm (3 tsf), Wheat flour: 12.5 gm (1/2 <i>chapati</i> ),<br>Water: 120ml (2/3 <sup>rd</sup> glass), Oil: 10ml (2 tsf)    | 85 gm (1 <i>katori</i> )                    | 185kcal        | 218kcal                        |
| 4. | Roti+Milk+Sugar   | Milk full cream: 50ml (1/4 <sup>th</sup> glass), Wheat flour: 25 gm (5 tsf /<br>1 <i>chapati</i> ), Sugar: 15gm (3 tsf), Oil: 5ml (1tsf)      | 102gm (1 <i>katori</i> )                    | 224kcal        | 220kcal                        |
| 5. | <i>Suji kheer</i> | <i>Suji</i> : 10 gm (2 tsf), Milk full cream: 150 ml (3/4 <sup>th</sup> glass), Sugar: 10 gm (2tsf), Oil: 5ml (1 tsf)                         | 99gm (1 <i>katori</i> )                     | 220kcal        | 222kcal                        |
| 6. | Rice <i>kheer</i> | Rice: 10 gm (2 tsf), Milk full cream: 200ml (1 full glass), Sugar:<br>10gm (2 tsf), Oil: 5ml (1 tsf)                                          | 112 gm (1 <i>katori</i> )                   | 254kcal        | 227kcal                        |
| 7. | <i>Suji Upma</i>  | <i>Suji</i> : 20 gm (4 tsf), Oil: 15 ml (3 tsf), Water: 120 ml (2/3 <sup>rd</sup> glass)                                                      | 119gm (1 <i>katori</i> )                    | 205kcal        | 172kcal                        |
| 8. | <i>Suji Halwa</i> | <i>Suji</i> : 15 gm (3 tsf), Sugar: 15 gm (3 tsf), Oil: 10 ml (2 tsf) + 5ml (1 tsf), Water: 100 ml (1/2 glass)                                | 92gm (1 <i>katori</i> )                     | 247kcal        | 268kcal                        |
| 9. | <i>Atta Halwa</i> | Wheat flour: 15 gm (3 tsf), Sugar: 15 gm (3 tsf), Oil: 10 ml (2 tsf),<br>Water: 120 ml (2/3 <sup>rd</sup> glass)                              | 115gm (1 <i>katori</i> )                    | 201kcal        | 175kcal                        |

**Household Measures:** tsf: teaspoonful, 1 tsf = 5 ml; 1 *katori*: 100 ml; 1 glass: 180 ml

The glass, *katori* and spoon to measure ingredients in household measures will be given by study team as gift to families

## RECIPES FOR PREPARING 1 KATORI FOOD

### DAL BASED

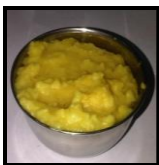

**KHICHRI: Raw ingredients:** *Moong dal*-3 tsp, Rice-3 tsp, Water-1 glass, Oil-2 tsp. **Method of preparation:** Soak 3 tsp *Moong dal* and 3 tsp rice in water. Boil 1 glass of water, add soaked *Moong dal* and rice, and salt to taste. Cover with lid and let it cook. Put the cooked *khichri* in *katori* and add 3 tsp of oil.

**RICE+DAL: Raw ingredients:** *Moong dal*- 4 tsp, water-1 glass; Rice- 3 tsp, Water- $\frac{1}{3}$  glass, Oil-2 tsp. **Method of preparation:** Soak 4 tsp *Moong dal* and 3 tsp rice in water. Boil one glass of water, add soaked *Moong dal* and salt to taste, cover with lid and let it cook. In another utensil, boil  $\frac{1}{3}$  glass of water and add soaked rice, cover with lid and let it cook. Mix the cooked rice and *dal* in a *katori* and add 2 tsp of oil.

**ROTI+DAL: Raw ingredients:** *Moong dal*-3 tsp, Water- $\frac{2}{3}$  glass, *Roti*- $\frac{1}{2}$ , Oil-2 tsp. **Method of preparation:** Soak 3 tsp *Moong dal* in water. Boil  $\frac{2}{3}$  glass of water, add soaked *Moong dal* and salt to taste, cover with lid and let it cook. Break  $\frac{1}{2}$  *roti* into very small pieces in a *katori*, pour cooked *dal* and add 2 tsp oil.

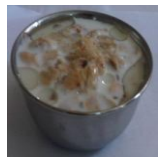

### MILK BASED

**ROTI+MILK+SUGAR: Raw ingredients** Milk (full cream)- $\frac{1}{4}$  glass, *Roti*-1, Sugar-3 tsp, Oil-1 tsp. **Method of preparation:** Mix 3 tsp sugar in  $\frac{1}{4}$  glass of milk. Break 1 *roti* into very small pieces in a *katori*, add sugar mixed milk and 1 tsp oil to it.

**RICE KHEER: Raw ingredients** Rice-2 tsp, Milk (full cream)-1 full glass, Sugar-2 tsp, Oil-1 tsp. **Method of preparation:** Boil one full glass of milk, add 2 tsp rice and let it get cooked. Once it is of thick consistency, add 2 tsp sugar. Pour in a *katori* and add 1 tsp of oil.

**SUJI KHEER: Raw ingredients** *Suji*-2 tsp, Milk (full cream)- $\frac{3}{4}$  glass, Sugar-2 tsp, Oil-1 tsp. **Method of preparation:** Roast 2 tsp of *suji*, add  $\frac{3}{4}$  glass of milk and let it get cooked. Once it is of thick consistency add 2 tsp sugar. Pour it into a *katori* and add 1 tsp of oil.

### SNACKS RECIPES

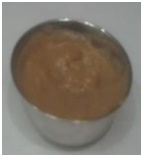

**ATTA HALWA: Raw ingredients** *Atta*-3 tsp, Sugar-3 tsp; Oil-2 tsp, Water- $\frac{2}{3}$  glass. **Method of preparation:** Heat 2 tsp oil and roast 3 tsp *atta*. Add 3 tsp sugar and  $\frac{2}{3}$  glass of water and cook it. Pour it into a *katori* and serve.

**SUJI HALWA: Raw ingredients** *Suji*-3 tsp, Sugar-3 tsp; Oil-2 tsp + 1 tsp, Water- $\frac{1}{2}$  glass. **Method of preparation:** Heat 2 tsp oil and roast 3 tsp *suji* in it. Add 3 tsp sugar and  $\frac{1}{2}$  glass of water and cook it. Pour in a *katori* and add 1 tsp oil.

**SUJI UPMA: Raw ingredients** *Suji*-4 tsp, Oil-3 tsp, Water- $\frac{2}{3}$  glass. **Method of preparation:** Heat 3 tsp oil and roast 4 tsp *suji*. Add  $\frac{2}{3}$  glass of water and salt to taste and cook it. Pour into a *katori* and serve

Use the given spoon, glass and *katori* to measure

## To Evaluate The Impact of Three Feeding Regimens On the Recovery of Children from Uncomplicated Severe Acute Malnutrition In India and to Use the Evidence to Inform National Policy

### Participant Card

Name of the Child: \_\_\_\_\_ Child Id: \_\_\_\_\_

Sex: \_\_\_\_\_ Date of birth: \_\_\_\_\_

Mother's name: \_\_\_\_\_ Father's name: \_\_\_\_\_

Date of enrollment: \_\_\_\_\_

Date of censorship: \_\_\_\_\_

### Please bring the child to the study clinic immediately if:

Child is unable to drink, stops feeding well, or develops fever, diarrhea, or fast or difficult breathing

### STUDY CLINIC

Centre for Health Research and Development, Society for Applied Studies, 680, Gali No. 5, Devli Gaon, Nai Basti, , New Delhi

### FOR QUERIES, CONTACT

Dr. Sanjana Mohan:  
9871119331

Dr. Sowmya Prakash

### TIMINGS

Monday to Friday: 9 am to 4 pm

Saturday: 9 am to 1 pm

## SPECIAL FOODS FOR MALNOURISHED CHILDREN

- The recipes given behind are special foods for malnourished children
- Feed your child \_\_\_\_\_ *katori* of these recipes everyday
- The child can eat these special foods as much as he/she wants at one time
- The child should eat these special foods every 2 to 4 hours
- The child should eat at least 8 times a day
- Give the child \_\_\_\_\_ tablets every day
- Feed other foods only if the child has consumed the recommended amount for the day
- Continue breast feeding
- Offer the child clean water to drink at will
- Wash your hand with soap and water before preparing the recipes given behind.
- Wash your and child's hands with soap and water before feeding
- Grind the tablet. Mix the powdered tablet in 1 to 2 teaspoons of the first meal for the day and feed this first. If two tablets are to be given, the second powdered tablet can be mixed in 1 to 2 teaspoon of the other meals to be offered during the day.
- Feed slowly
- Store the raw ingredients in the jars provided and keep in a secure place

**If you have to go out of station suddenly for a few days, please contact us – Devender: 8588863074**

**PRIMARY AND SECONDARY OUTCOMES IN THE TREATMENT PHASE BY SITE**

**Action Research and Training for Health, Udaipur, Rajasthan**

|                                                                                       | Treatment Groups |                |                 |
|---------------------------------------------------------------------------------------|------------------|----------------|-----------------|
|                                                                                       | A-HPF<br>n=88    | RUTF-C<br>n=83 | RUTF- L<br>n=96 |
| <b>Primary Outcome</b>                                                                |                  |                |                 |
| Recovered by 16 weeks                                                                 | 32 (36.4)        | 32 (38.6)      | 53 (55.2)       |
| <b>Secondary Outcomes</b>                                                             |                  |                |                 |
| Weight gain in g/kg/day of baseline weight; Mean (SD)                                 | 2.1 (2.1)        | 2.2 (2.2)      | 3.8 (4.3)       |
| Median(IQR)                                                                           | 1.2 (0.8, 2.8)   | 1.2 (0.8, 3.4) | 1.9 (0.9, 5.2)  |
| Time to recovery (wk) in children who recovered during the treatment phase, Mean (SD) | 7.6 (4.0)        | 5.8 (3.8)      | 5.8 (3.9)       |
|                                                                                       | 7.5 (4.5, 10.5)  | 5 (3, 8.5)     | 5 (3, 9)        |
| Children died                                                                         | 0                | 1              | 0               |
| Children hospitalized                                                                 | 10 (11.4)        | 4 (4.8)        | 7 (7.3)         |
|                                                                                       | <b>n=77</b>      | <b>n=68</b>    | <b>n=83</b>     |
| Children with diarrhea                                                                | 47 (61.0)        | 38 (55.9)      | 45 (54.2)       |
| Children with ALRI                                                                    | 18 (23.4)        | 6 (8.8)        | 14 (16.9)       |
| Children with fever                                                                   | 52 (67.5)        | 40 (58.8)      | 42 (50.6)       |

**Christian Medical College, Vellore, Tamil Nadu**

|                                                                                       | Treatment Groups |                |                 |
|---------------------------------------------------------------------------------------|------------------|----------------|-----------------|
|                                                                                       | A-HPF<br>n=78    | RUTF-C<br>n=80 | RUTF- L<br>n=79 |
| <b>Primary Outcome</b>                                                                |                  |                |                 |
| Recovered by 16 weeks                                                                 | 30 (38.5)        | 39 (48.8)      | 43 (54.4)       |
| <b>Secondary Outcomes</b>                                                             |                  |                |                 |
| Weight gain in g/kg/day of baseline weight; Mean (SD)                                 | 1.9 (2.5)        | 3.0 (3.6)      | 3.1 (3.8)       |
| Median (IQR)                                                                          | 1.3 (0.8, 2.4)   | 1.5 (0.9, 3.5) | 1.8 (0.8,3.5)   |
| Time to recovery (wk) in children who recovered during the treatment phase, Mean (SD) | 8.3 (4.8)        | 6.2 (4.2)      | 6.4 (3.9)       |
| Median (IQR)                                                                          | 8.5 (4, 12)      | 5 (3, 10)      | 6 (3, 9)        |
| Children died                                                                         | 0                | 0              | 0               |
| Children hospitalized                                                                 | 6 (7.7)          | 10 (12.5)      | 5 (6.3)         |
|                                                                                       | <b>n=72</b>      | <b>n=73</b>    | <b>n=73</b>     |
| Children with diarrhea                                                                | 10 (13.9)        | 10 (13.7)      | 5 (6.9)         |
| Children with ALRI                                                                    | 3 (4.2)          | 3 (4.1)        | 5 (6.9)         |
| Children with fever                                                                   | 40 (55.6)        | 32 (43.8)      | 36 (49.3)       |

**Centre for Health Research and Development, Society for Applied Studies, New Delhi**

|                                                                                       | Treatment Groups |                 |                  |
|---------------------------------------------------------------------------------------|------------------|-----------------|------------------|
|                                                                                       | A-HPF<br>n=119   | RUTF-C<br>n=117 | RUTF- L<br>n=115 |
| <b>Primary Outcome</b>                                                                |                  |                 |                  |
| Recovered by 16 weeks                                                                 | 60 (50.4)        | 62 (53.0)       | 69 (60.0)        |
| <b>Secondary Outcomes</b>                                                             |                  |                 |                  |
| Weight gain in g/kg/day of baseline weight; Mean (SD)                                 | 3.5 (4.5)        | 3.7 (3.8)       | 3.6 (3.7)        |
| Median (IQR)                                                                          | 1.8 (0.9, 4.1)   | 2.3 (0.9, 5.1)  | 2.3 (1.1, 5.0)   |
| Time to recovery (wk) in children who recovered during the treatment phase, Mean (SD) | 6.3 (4.6)        | 5.8 (4.1)       | 6.0 (4.2)        |
| Median (IQR)                                                                          | 5 (2.5, 9)       | 5 (2,8)         | 5 (3, 9)         |
| Children died                                                                         | 0                | 1               | 1                |
| Children hospitalized                                                                 | 14 (11.8)        | 16 (13.7)       | 10 (8.7)         |
|                                                                                       | <b>n=94</b>      | <b>n=94</b>     | <b>n=93</b>      |
| Children with diarrhea                                                                | 44 (46.8)        | 44 (46.8)       | 59 (63.4)        |
| Children with ALRI                                                                    | 17 (18.1)        | 15 (16.0)       | 16 (17.2)        |
| Children with fever                                                                   | 70 (74.5)        | 70 (74.5)       | 66 (71.0)        |

All values are n (%) unless otherwise indicated; Diarrhoea: Passage of ≥ 3 loose or watery stools in 24 hour period  
ALRI: Presence of cough OR difficult breathing and either fast breathing or lower chest indrawing); Fever as reported by caregiver

### Characteristics of children from the African trials and the current India trial

|                             | <b>Oedema/All children</b> | <b>WHZ<br/>Mean (SD)</b> | <b>HAZ<br/>Mean (SD)</b> | <b>MUAC<br/>Mean (SD)</b> |
|-----------------------------|----------------------------|--------------------------|--------------------------|---------------------------|
| Ciliberto 2005              | 434/992 (43.8%)            | -2.2 (0.8)               | -3.0 (1.5)               | 11.6 (1.4)                |
| Manary 2004                 | 77/96 (80.2%)              | -2.0 (0.9)               | -3.7 (1.6)               | 11.9 (1.5)                |
| Ndeka 2005                  | 11/28 (39%)                | -2.8 (0.9)               | -3.4 (1.5)               | 10.6 (1.4)                |
| Oakley 2010                 | 721/929 (77.6%)            | -2.0 (0.9)               | -3.0 (1.5)               | 12.2 (1.3)                |
| <b>India, current trial</b> | <b>2/903 (0.2%)</b>        | <b>-3.5 (0.5)</b>        | <b>-3.0 (1.5)</b>        | <b>11.8 (0.8)</b>         |

The key differences between the children enrolled in our study and the African studies were:

- The prevalence of oedema ranged from 39% to 80% in African studies, but was only 0.2% in our trial i.e. we had predominantly marasmic type of SAM, whereas Africa had kwashiorkor in a large proportion.
- The mean WHZ ranged from -2.0 to -2.8 in the African studies but was -3.5 in our study.
- The mean HAZ and MUAC in our study with that of African studies was similar.

It should also be noted that most of the African studies used height at enrolment to calculate WHZ during follow up rather than height measured at same time as the weight. In our study, we measured both height and weight at each weekly visit during follow up. Using height at enrolment would artificially increase the proportion of children who reach cut off for recovery.



## SITE-SPECIFIC BASELINE CHARACTERISTICS OF ENROLLED CHILDREN AND THEIR FAMILIES

Action Research and Training for Health, Udaipur, Rajasthan

|                                                               | Treatment Groups |                  |                  |
|---------------------------------------------------------------|------------------|------------------|------------------|
|                                                               | A-HPF<br>(n=95)  | RUTF-C<br>(n=90) | RUTF-L<br>(n=99) |
| Age at enrolment, mean (SD)                                   | 25.5 (13.8)      | 25.6 (14.8)      | 25.7 (14.3)      |
| Males                                                         | 36 (37.9)        | 29 (32.2)        | 42 (42.4)        |
| Weight-for-height Z score, mean (SD)                          | -3.5 (0.4)       | -3.4 (0.4)       | -3.4 (0.5)       |
| < -3 to ≥ -4                                                  | 81 (85.3)        | 80 (88.9)        | 85 (85.9)        |
| < -4                                                          | 14 (14.7)        | 10 (11.1)        | 14 (14.1)        |
| Height-for-age Z Score: mean (SD)                             | -3.7 (1.1)       | -3.4 (1.1)       | -3.8 (1.4)       |
| ≥ -2                                                          | 11 (11.6)        | 7 (7.8)          | 10 (10.1)        |
| < -2 to ≥ -3                                                  | 19 (20.0)        | 27 (30.0)        | 17 (17.2)        |
| < -3 to ≥ -4                                                  | 28 (29.5)        | 30 (33.3)        | 36 (36.4)        |
| < -4                                                          | 37 (39.0)        | 26 (28.9)        | 36 (36.4)        |
| Mid-upper arm circumference: mean (SD)                        | 11.5 (0.7)       | 11.6 (0.7)       | 11.4 (1.0)       |
| <11.5 cm                                                      | 38 (40.0)        | 31 (34.4)        | 44 (44.4)        |
| 11.5 to 12.4 cm                                               | 51 (53.7)        | 53 (58.9)        | 44 (44.4)        |
| 12.5 -13.0 cm                                                 | 6 (6.3)          | 6 (6.7)          | 11 (11.1)        |
| Fever/diarrhea/cough or cold/fast breathing) in previous 2 wk | 63 (66.3)        | 50 (50.6)        | 64 (64.7)        |
| Mother's age, mean (SD)                                       | 29.8 (6.5)       | 31.2 (7.4)       | 29.0 (5.7)       |
| Mother's BMI <18.5 kg/m <sup>2</sup> *                        | 57 (60.0)        | 48 (53.3)        | 65 (65.7)        |
| Mother never been to school                                   | 70 (74.5)        | 68 (75.6)        | 71 (72.5)        |
| Mother's years of schooling, median (IQR)                     | 1.9 (3.5)        | 1.7 (2.8)        | 1.7 (2.7)        |
| Father never been to school                                   | 35 (37.2)        | 39 (44.3)        | 32 (32.7)        |
| Father's years of schooling, median (IQR)                     | 3.7 (3.4)        | 3.6 (3.9)        | 3.9 (3.4)        |
| Religion of head of family                                    |                  |                  |                  |
| Hindu                                                         | 95 (100.0)       | 89 (98.9)        | 98 (99.0)        |
| Muslim                                                        | 0                | 1                | 1                |
| Other                                                         | 0                | 0                | 0                |
| Caste of head of family                                       |                  |                  |                  |
| Schedule caste/ schedule tribe                                | 82 (87.2)        | 79 (87.8)        | 87 (87.9)        |
| Backward                                                      | 6 (6.4)          | 4 (4.4)          | 5 (5.1)          |
| High                                                          | 6 (6.4)          | 7 (7.8)          | 7 (7.1)          |
| Persons residing in the house, mean (SD)                      | 6.3 (2.3)        | 6.4 (2.0)        | 6.6 (2.5)        |
| Piped water                                                   | 0                | 0                | 0                |
| Flush toilet within the house                                 | 0                | 0                | 0                |
| Facility delivery                                             | 47 (49.5)        | 59 (65.6)        | 55 (55.6)        |
| Family with below poverty line card                           | 45 (47.4)        | 44 (48.9)        | 48 (48.9)        |
| Type of family, nuclear                                       | 52 (54.7)        | 49 (54.4)        | 59 (59.6)        |

All values are n (%) unless otherwise indicated

\*BMI measurement missing for 50 mothers: A-HPF (n=20), RUTF-C (n=17), RUTF-L (n=13)

|                                                               | Treatment Groups |                  |                  |
|---------------------------------------------------------------|------------------|------------------|------------------|
|                                                               | A-HPF<br>(n=83)  | RUTF-C<br>(n=84) | RUTF-L<br>(n=84) |
| Age at enrolment, mean (SD)                                   | 25.0 (14.4)      | 23.2 (12.4)      | 24.0 (12.2)      |
| Males                                                         | 43 (51.8)        | 47 (56.0)        | 46 (54.8)        |
| Weight-for-height Z score, mean (SD)                          | -3.5 (0.5)       | -3.5 (0.5)       | -3.4 (0.3)       |
| < -3 to ≥ -4                                                  | 72 (86.7)        | 75 (89.3)        | 80 (95.2)        |
| < -4                                                          | 11 (13.3)        | 9 (10.7)         | 4 (4.8)          |
| Height-for-age Z Score: mean (SD)                             | -2.7 (1.3)       | -2.5 (1.3)       | -2.4 (1.1)       |
| ≥ -2                                                          | 30 (36.1)        | 31 (36.9)        | 28 (33.3)        |
| < -2 to ≥ -3                                                  | 28 (33.7)        | 23 (27.4)        | 32 (38.1)        |
| < -3 to ≥ -4                                                  | 14 (16.9)        | 21 (25.0)        | 17 (20.2)        |
| < -4                                                          | 11 (13.3)        | 9 (10.7)         | 7 (8.3)          |
| Mid-upper arm circumference: mean (SD)                        | 12.0 (0.7)       | 12.1 (0.7)       | 12.1 (0.6)       |
| <11.5 cm                                                      | 15 (18.1)        | 13 (15.5)        | 11 (13.1)        |
| 11.5 to 12.4 cm                                               | 42 (50.6)        | 41 (48.8)        | 43 (51.2)        |
| 12.5 -13.0 cm                                                 | 26 (31.3)        | 30 (35.7)        | 30 (35.7)        |
| Fever/diarrhea/cough or cold/fast breathing) in previous 2 wk | 32 (38.6)        | 40 (47.6)        | 32 (38.1)        |
| Mother's age, mean (SD)                                       | 25.4 (4.1)       | 26.4 (4.3)       | 27.0 (4.7)       |
| Mother's BMI <18.5 kg/m <sup>2</sup>                          | 26 (31.3)        | 26 (31.0)        | 20 (23.8)        |
| Mother never been to school                                   | 2 (2.4)          | 4 (4.8)          | 2 (2.5)          |
| Mother's years of schooling, median (IQR)                     | 8.2 (3.2)        | 8.3 (3.6)        | 9.1 (2.9)        |
| Father never been to school                                   | 5 (6.0)          | 3 (3.6)          | 4 (4.8)          |
| Father's years of schooling, median (IQR)                     | 7.9 (3.5)        | 8.5 (4.1)        | 8.1 (3.3)        |
| Religion of head of family                                    |                  |                  |                  |
| Hindu                                                         | 61 (73.5)        | 62 (73.8)        | 56 (66.7)        |
| Muslim                                                        | 18 (21.7)        | 15 (17.9)        | 14 (16.7)        |
| Other                                                         | 4 (4.8)          | 7 (8.3)          | 14 (16.7)        |
| Caste of head of family                                       |                  |                  |                  |
| Schedule caste/ schedule tribe                                | 22 (26.5)        | 18 (21.4)        | 29 (34.5)        |
| Backward                                                      | 52 (62.7)        | 56 (66.7)        | 48 (57.1)        |
| High                                                          | 9 (10.8)         | 10 (11.9)        | 7 (8.3)          |
| Persons residing in the house, mean (SD)                      | 5.4 (2.3)        | 4.9 (1.6)        | 5.4 (2.1)        |
| Piped water                                                   | 31 (37.4)        | 30 (35.7)        | 31 (36.9)        |
| Flush toilet within the house                                 | 47 (56.6)        | 43 (51.8)        | 52 (61.9)        |
| Facility delivery                                             | 81 (97.6)        | 81 (96.4)        | 83 (98.8)        |
| Family with below poverty line card                           | 37 (44.6)        | 44 (52.4)        | 47 (56.0)        |
| Type of family, nuclear                                       | 45 (54.2)        | 62 (73.8)        | 51 (60.7)        |

All values are n (%) unless otherwise indicated

|                                                               | Treatment Groups |                   |                   |
|---------------------------------------------------------------|------------------|-------------------|-------------------|
|                                                               | A-HPF<br>(n=123) | RUTF-C<br>(n=124) | RUTF-L<br>(n=124) |
| Age at enrolment, mean (SD)                                   | 26.4 (14.0)      | 25.1 (14.1)       | 26.9 (14.8)       |
| Males                                                         | 64 (52.0)        | 73 (58.9)         | 75 (60.5)         |
| Weight-for-height Z score, mean (SD)                          | -3.4 (0.4)       | -3.5 (0.5)        | -3.3 (0.4)        |
| < -3 to ≥ -4                                                  | 113 (91.9)       | 112 (90.3)        | 114 (91.9)        |
| < -4                                                          | 10 (8.1)         | 12 (9.7)          | 7 (5.7)           |
| Height-for-age Z Score: mean (SD)                             | -2.7 (1.2)       | -2.8 (1.1)        | -2.9 (1.2)        |
| ≥ -2                                                          | 34 (27.6)        | 30 (24.2)         | 29 (23.4)         |
| < -2 to ≥ -3                                                  | 36 (29.3)        | 44 (35.5)         | 38 (30.7)         |
| < -3 to ≥ -4                                                  | 42 (34.2)        | 31 (25.0)         | 37 (29.8)         |
| < -4                                                          | 11 (8.9)         | 19 (15.3)         | 20 (16.1)         |
| Mid-upper arm circumference: mean (SD)                        | 11.9 (0.8)       | 11.9 (0.8)        | 12.0 (0.7)        |
| <11.5 cm                                                      | 23 (18.7)        | 28 (22.6)         | 21 (16.9)         |
| 11.5 to 12.4 cm                                               | 71 (57.7)        | 69 (55.7)         | 72 (58.1)         |
| 12.5 -13.0 cm                                                 | 29 (23.6)        | 27 (21.8)         | 31 (25.0)         |
| Fever/diarrhea/cough or cold/fast breathing) in previous 2 wk | 64 (52.0)        | 72 (58.1)         | 70 (56.5)         |
| Mother's age, mean (SD)                                       | 26.2 (5.0)       | 26.2 (4.2)        | 26.3 (4.0)        |
| Mother's BMI <18.5 kg/m <sup>2</sup> *                        | 51 (41.5)        | 61 (49.2)         | 66 (53.2)         |
| Mother never been to school                                   | 45 (36.6)        | 44 (35.5)         | 63 (51.2)         |
| Mother's years of schooling, median (IQR)                     | 5.1 (4.6)        | 5.4 (4.8)         | 3.7 (4.6)         |
| Father never been to school                                   | 19 (15.5)        | 24 (19.4)         | 33 (26.8)         |
| Father's years of schooling, median (IQR)                     | 7.5 (4.2)        | 7.3 (4.3)         | 6.5 (4.5)         |
| Religion of head of family                                    |                  |                   |                   |
| Hindu                                                         | 86 (69.9)        | 95 (77.2)         | 94 (77.7)         |
| Muslim                                                        | 36 (29.3)        | 28 (22.8)         | 24 (19.8)         |
| Other                                                         | 1                | 0                 | 3 (2.5)           |
| Caste of head of family                                       |                  |                   |                   |
| Schedule caste/ schedule tribe                                | 37 (30.1)        | 37 (30.1)         | 42 (34.7)         |
| Backward                                                      | 43 (35.0)        | 44 (35.8)         | 33 (27.3)         |
| High                                                          | 43 (35.0)        | 42 (34.2)         | 46 (38.0)         |
| Persons residing in the house, mean (SD)                      | 5.8 (2.6)        | 5.7 (3.0)         | 5.7 (2.4)         |
| Piped water                                                   | 24 (19.5)        | 21 (17.1)         | 26 (21.5)         |
| Flush toilet within the house                                 | 98 (79.7)        | 107 (87.0)        | 99 (81.8)         |
| Facility delivery                                             | 76 (61.8)        | 82 (66.7)         | 66 (54.1)         |
| Family with below poverty line card                           | 15 (12.2)        | 12 (9.8)          | 10 (8.3)          |
| Type of family, nuclear                                       | 78 (63.4)        | 85 (68.6)         | 79 (63.7)         |

All values are n (%) unless otherwise indicated

\*BMI measurement missing for 3 mothers: A-HPF (n=1), RUTF-C (n=0), RUTF-L (n=2)

## **REQUESTS FOR COMPLETE STUDY PROTOCOL**

Requests for complete study protocol can be sent to the corresponding author. The details are provided below.

Dr. Nita Bhandari, Director, Centre for Health Research and Development,

Society for Applied Studies, 45, Kalu Sarai, New Delhi-110016, India

Tel: 00 91 11 46043751-55; Fax: 00 91 11 46043756; Email: [nita.bhandari@sas.org.in](mailto:nita.bhandari@sas.org.in)
